# Supplementary material for: Effects of Salt Treatment Time on the Metabolites, Microbial Composition, and Quality Characteristics of the Soy Sauce Moromi Extract
Source: MDPI journal article supplement (doi:10.3390/foods11010063), 2021-12-28
Supplement: s1 [file s1]

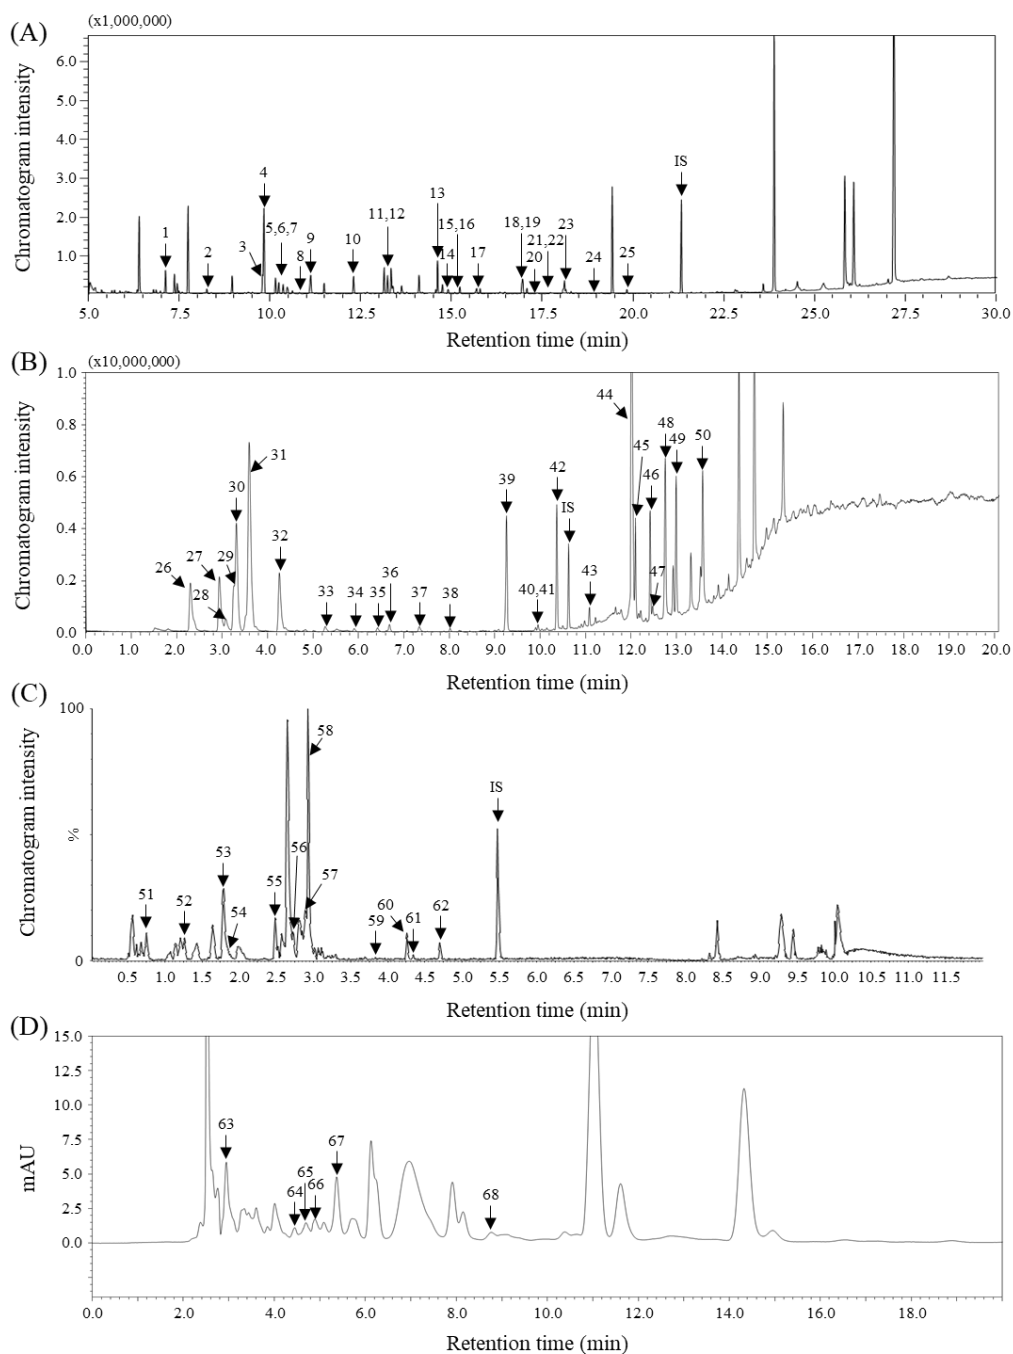

**Figure S1.** Representative chromatograms of citrus flesh metabolites analyzed by GC/MS (A: non-volatile compounds and B: volatile compounds), LC/MS (C), and HPLC (D). 1, alanine; 2, 2-aminobutanoic acid; 3, phosphoric acid; 4, glycerol; 5, isoleucine; 6, proline; 7, glycine; 8, uracil; 9, serine; 10, acetyl acetophenone; 11, meso-erythritol; 12, aspartic acid; 13, glutamic acid; 14, arabinose; 15, lyxose; 16, asparagine; 17, lysine; 18, arabinol; 19, citric acid; 20, tyropanose; 21, mannose; 22, altronic acid; 23, mannitol; 24, galactonic acid; 25, myo-inositol; 26, acetone; 27, acetic acid ethyl ester; 28, 2-butanone; 29, 2-tehyllbutanal; 30, 3-methylbutanal; 31, ethanol; 32, 2,3-butandione; 33, 2-butanol; 34, 2,3-pentanedione; 35, hexanal; 36, isobutanol; 37, isovaleronitrile; 38, 1-penten-3-ol; 39, isophenyl alcohol; 40, isopropenylethyl alcohol; 41, 1-pentanol; 42, acetoin; 43, lactic acid ethyl ester; 44, acetic acid; 45, 1-octen-3-ol; 46, 2-ethyl hexanol; 47, 1,2-butanediol; 48, 2,3-butanediol; 49, 1,3-butanediol; 50, isovaleric acid; 51, pro-arg; 52, glu-val; 53, phenylacetaldehyde; 54, cyclo(his-pro); 55, leu-glu; 56, tyr-pro; 57, trp-as; 58, tryptophan; 59, glutamic acid 5-benzyl ester; 60, daidzein; 61, glycitein; 62, genistein; 63, oxalic acid; 64, malic acid; 65, ascorbic acid; 66, malonic acid; 67, lactic acid; 68, succinic acid. IS: internal standard.

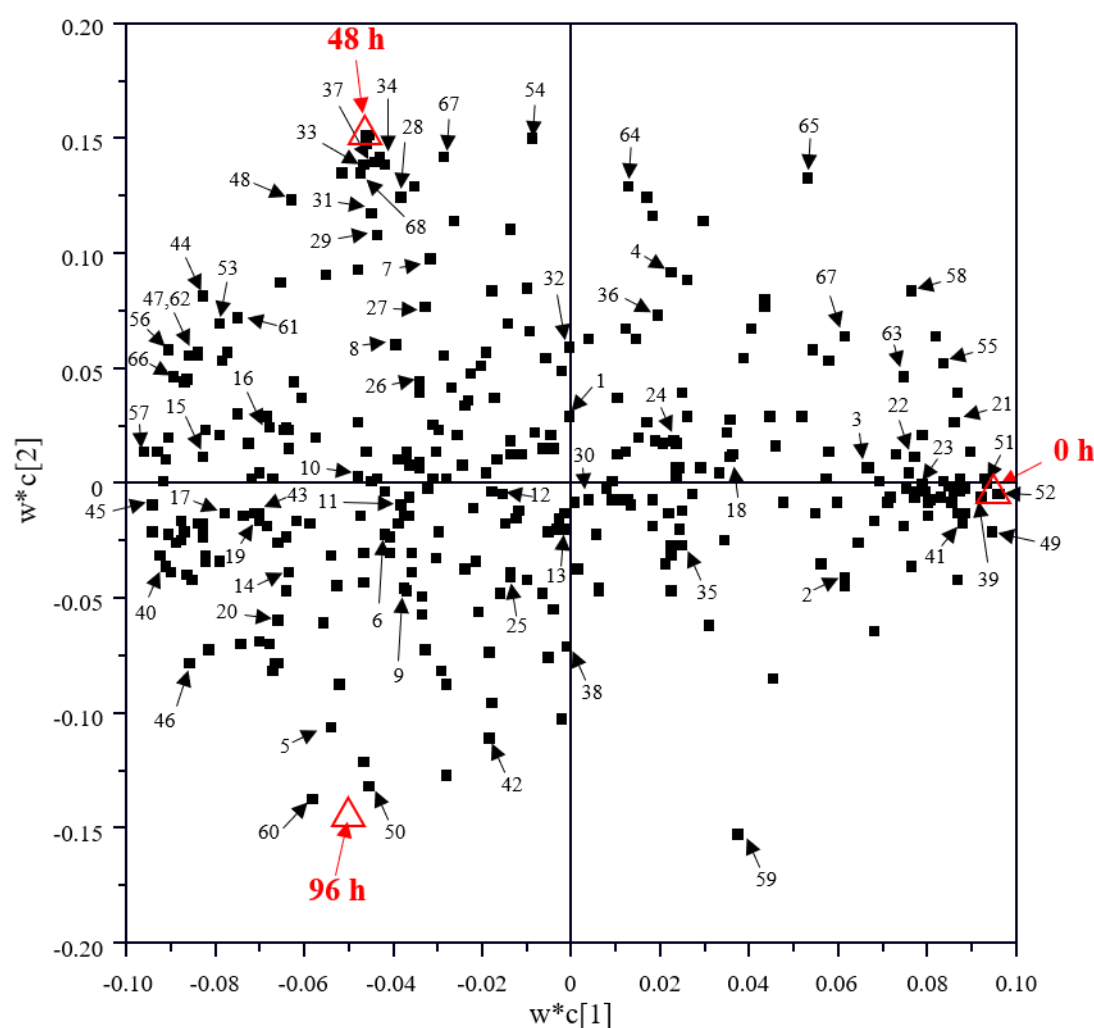

**Figure S2.** PLS-DA loading scatter plot. 1, alanine; 2, 2-aminobutanoic acid; 3, phosphoric acid; 4, glycerol; 5, isoleucine; 6, proline; 7, glycine; 8, uracil; 9, serine; 10, acetyl acetophenone; 11, meso-erythritol; 12, aspartic acid; 13, glutamic acid; 14, arabinose; 15, lyxose; 16, asparagine; 17, lysine; 18, arabitol; 19, citric acid; 20, tyropanose; 21, mannose; 22, altronic acid; 23, mannitol; 24, galactonic acid; 25, myo-inositol; 26, acetone; 27, acetic acid ethyl ester; 28, 2-butanone; 29, 2-tehylbutanal; 30, 3-methylbutanal; 31, ethanol; 32, 2,3-butandione; 33, 2-butanol; 34, 2,3-pentanedione; 35, hexanal; 36, isobutanol; 37, isovaleronitrile; 38, 1-penten-3-ol; 39, isophenyl alcohol; 40, isopropenylethyl alcohol; 41, 1-pentanol; 42, acetoin; 43, lactic acid ethyl ester; 44, acetic acid; 45, 1-octen-3-ol; 46, 2-ethyl hexanol; 47, 1,2-butanediol; 48, 2,3-butanediol; 49, 1,3-butanediol; 50, isovaleric acid; 51, pro-arg; 52, glu-val; 53, phenylacetaldehyde; 54, cyclo(his-pro); 55, leu-glu; 56, tyr-pro; 57, trp-asp; 58, tryptophan; 59, glutamic acid 5-benzyl ester; 60, daidzein; 61, glycitein; 62, genistein; 63, oxalic acid; 64, malic acid; 65, ascorbic acid; 66, malonic acid; 67, lactic acid; 68, succinic acid.

**Table S1.** Identification of major metabolites contributing to the separation of samples on the PLS-DA score plots by GC/MS analysis.

|                           | RT    | Compounds                | RI   |
|---------------------------|-------|--------------------------|------|
| non-volatile<br>compounds | 7.12  | alanine                  | 1073 |
|                           | 8.26  | 2-aminobutyric acid      | 1150 |
|                           | 9.80  | phosphoric acid          | 1265 |
|                           | 9.84  | glycerol                 | 1268 |
|                           | 10.15 | isoleucine               | 1288 |
|                           | 10.24 | proline                  | 1293 |
|                           | 10.36 | glycine                  | 1301 |
|                           | 10.81 | uracil                   | 1331 |
|                           | 11.12 | serin                    | 1351 |
|                           | 12.30 | acetyl acetophenone      | 1434 |
|                           | 13.24 | meso-erythritol          | 1506 |
|                           | 13.34 | aspartic acid            | 1513 |
|                           | 14.61 | glutamic acid            | 1613 |
|                           | 14.90 | arabinose                | 1636 |
|                           | 15.09 | lyxose                   | 1652 |
|                           | 15.23 | asparagine               | 1663 |
|                           | 15.67 | lysine                   | 1699 |
|                           | 16.85 | ornithine                | 1801 |
|                           | 16.94 | citric acid              | 1810 |
|                           | 17.36 | talopyranose             | 1848 |
|                           | 17.72 | mannose                  | 1880 |
|                           | 17.79 | altronic acid            | 1886 |
|                           | 18.15 | mannitol                 | 1920 |
|                           | 18.90 | galactonic acid          | 1992 |
|                           | 19.82 | myo-inositol             | 2083 |
| volatile<br>compounds     | 2.31  | acetone                  | 821  |
|                           | 2.94  | acetic acid ethyl ester  | 885  |
|                           | 3.09  | 2-butanone               | 917  |
|                           | 3.26  | 2-methylbutanal          | 906  |
|                           | 3.31  | 3-methylbutanal          | 925  |
|                           | 3.60  | ethanol                  | 926  |
|                           | 4.27  | 2,3-butanedione          | 977  |
|                           | 5.28  | 2-butanol                | 1030 |
|                           | 5.90  | 2,3-pentanedione         | 1060 |
|                           | 6.42  | hexanal                  | 1079 |
|                           | 6.68  | isobutanol               | 1150 |
|                           | 7.38  | 5-methyl-3-hexen-2-one   | 1152 |
|                           | 8.22  | 1-penten-3-ol            | 1157 |
|                           | 9.26  | isopentyl alcohol        | 1211 |
|                           | 9.90  | isopropenylethyl alcohol | 1250 |
|                           | 9.95  | 1-pentanol               | 1261 |
|                           | 10.37 | acetoin                  | 1285 |
|                           | 11.09 | lactic acid ethyl ester  | 1340 |
|                           | 12.04 | acetic acid              | 1415 |
|                           | 12.10 | 1-octen-3-ol             | 1456 |
|                           | 12.42 | 2-ethyl hexanol          | 1492 |
|                           | 12.51 | 1,2-butanediol           | 1563 |
|                           | 12.76 | 2,3-butanediol           | 1583 |
|                           | 13.00 | 1,3-butanediol           | 1578 |
|                           | 13.58 | isovaleric acid          | 1680 |

RT, retention time; RI: retention index.

**Table S2.** Identification of major metabolites contributing to the separation of samples on the PLS-DA score plots by UPLC-Q-TOF MS and HPLC.

|                   | RT   | Compounds                       | Exact Mass<br>(m/z) | MS Fragments       |
|-------------------|------|---------------------------------|---------------------|--------------------|
| UPLC-Q-<br>TOF MS | 0.75 | pro-arg                         | 272.1641            | 70, 116, 130       |
|                   | 1.26 | glu-val                         | 247.1264            | 72                 |
|                   | 1.77 | phenylacetaldehyde              | 121.0621            | 77, 103, 91        |
|                   | 1.80 | cyclo(his-pro)                  | 235.1153            | 110                |
|                   | 2.48 | leu-glu                         | 261.1424            | 86                 |
|                   | 2.71 | tyr-pro                         | 279.1319            | 116, 136, 181, 119 |
|                   | 2.80 | trp-asg                         | 320.1176            | 159, 303, 144, 170 |
|                   | 2.92 | tryptophan                      | 188.0681            | 188, 146, 118      |
|                   | 3.83 | glutamic acid 5-benzyl<br>ester | 238.1020            |                    |
|                   | 4.25 | daidzein                        | 255.0624            | 237, 137           |
|                   | 4.34 | glycitein                       | 285.0717            | 270                |
|                   | 4.70 | genistein                       | 271.0562            | 153, 253           |
| HPLC              | 3.13 | oxalic acid                     |                     |                    |
|                   | 4.40 | malic acid                      |                     |                    |
|                   | 4.80 | ascorbic acid                   |                     |                    |
|                   | 4.87 | malonic acid                    |                     |                    |
|                   | 5.36 | lactic acid                     |                     |                    |
|                   | 8.78 | succinic acid                   |                     |                    |

RT, retention time.

**Table S3.** Pearson correlation coefficient between microorganism and metabolites.

|                          |                              | <i>Enterococcaceae</i> | <i>Lactobacillaceae</i> | <i>Staphylococcaceae</i> | <i>Bacillaceae</i> | <i>Enterobacteriaceae</i> |
|--------------------------|------------------------------|------------------------|-------------------------|--------------------------|--------------------|---------------------------|
| sugar                    | meso-erythritol              | 0.85                   | 0.94                    | -0.91                    | -0.95              | -0.95                     |
|                          | myo-inositol                 | 0.67                   | 0.81                    | -0.76                    | -0.83              | -0.84                     |
|                          | lyxose                       | 0.56                   | 0.70                    | -0.64                    | -0.71              | -0.72                     |
|                          | arabinose                    | -0.68                  | -0.71                   | 0.70                     | 0.71               | 0.72                      |
|                          | mannose                      | -0.68                  | -0.68                   | 0.68                     | 0.67               | 0.67                      |
|                          | talopyranose                 | -0.71                  | -0.74                   | 0.73                     | 0.74               | 0.74                      |
|                          | altronic acid                | -0.78                  | -0.88                   | 0.84                     | 0.89               | 0.89                      |
|                          | mannitol                     | -0.93                  | -0.91                   | 0.92                     | 0.90               | 0.90                      |
|                          | galactonic acid              | -0.95                  | -0.99                   | 0.98                     | 0.99               | 0.99                      |
| acidic compounds         | acetic acid                  | 0.96                   | 0.99                    | -0.99                    | -0.99              | -0.99                     |
|                          | ascorbic acid                | 0.96                   | 0.94                    | -0.96                    | -0.93              | -0.93                     |
|                          | lactic acid                  | 0.71                   | 0.54                    | -0.62                    | -0.52              | -0.50                     |
|                          | malonic acid                 | 0.54                   | 0.36                    | -0.44                    | -0.33              | -0.31                     |
|                          | citric acid                  | 0.50                   | 0.65                    | -0.59                    | -0.67              | -0.68                     |
|                          | phosphoric acid              | 0.33                   | 0.18                    | -0.25                    | -0.16              | -0.15                     |
|                          | oxalic acid                  | 0.11                   | -0.08                   | 0.00                     | 0.10               | 0.12                      |
|                          | malic acid                   | -0.28                  | -0.49                   | 0.41                     | 0.52               | 0.54                      |
|                          | succinic acid                | -0.49                  | -0.61                   | 0.56                     | 0.62               | 0.63                      |
|                          | isovaleric acid              | -0.65                  | -0.76                   | 0.72                     | 0.77               | 0.77                      |
| amino acids and peptides | leu-glu                      | 0.93                   | 0.89                    | -0.91                    | -0.88              | -0.87                     |
|                          | aspartic acid                | 0.88                   | 0.96                    | -0.94                    | -0.97              | -0.97                     |
|                          | trp-aspartic                 | 0.86                   | 0.82                    | -0.84                    | -0.81              | -0.80                     |
|                          | glycine                      | 0.85                   | 0.93                    | -0.90                    | -0.93              | -0.94                     |
|                          | alanine                      | 0.83                   | 0.90                    | -0.88                    | -0.91              | -0.91                     |
|                          | isoleucine                   | 0.82                   | 0.91                    | -0.88                    | -0.91              | -0.92                     |
|                          | glutamic acid 5-benzyl ester | 0.82                   | 0.83                    | -0.83                    | -0.82              | -0.82                     |
|                          | ornithine                    | 0.81                   | 0.89                    | -0.86                    | -0.90              | -0.90                     |
|                          | tryptophan                   | 0.79                   | 0.86                    | -0.84                    | -0.86              | -0.87                     |
|                          | glutamic acid                | 0.78                   | 0.88                    | -0.84                    | -0.89              | -0.89                     |
|                          | 2-aminobutyric acid          | 0.77                   | 0.85                    | -0.82                    | -0.85              | -0.86                     |
|                          | proline                      | 0.70                   | 0.76                    | -0.74                    | -0.76              | -0.76                     |
|                          | tyr-pro                      | 0.65                   | 0.66                    | -0.66                    | -0.66              | -0.66                     |
|                          | serin                        | 0.60                   | 0.74                    | -0.68                    | -0.75              | -0.76                     |
|                          | glu-val                      | 0.49                   | 0.36                    | -0.42                    | -0.35              | -0.33                     |
|                          | lysine                       | 0.23                   | 0.43                    | -0.35                    | -0.46              | -0.47                     |
|                          | asparagine                   | 0.06                   | -0.13                   | 0.05                     | 0.15               | 0.17                      |
|                          | pro-arg                      | -0.29                  | -0.42                   | 0.36                     | 0.43               | 0.44                      |
|                          | cyclo(his-pro)               | -0.85                  | -0.89                   | 0.88                     | 0.89               | 0.89                      |
| alcohols                 | ethanol                      | 0.96                   | 0.88                    | -0.92                    | -0.87              | -0.86                     |
|                          | 1,3-butanediol               | 0.94                   | 0.91                    | -0.93                    | -0.90              | -0.89                     |
|                          | isopropenylethyl alcohol     | 0.91                   | 0.85                    | -0.88                    | -0.84              | -0.83                     |
|                          | 2,3-butanediol               | 0.87                   | 0.81                    | -0.84                    | -0.79              | -0.78                     |
|                          | glycerol                     | 0.76                   | 0.86                    | -0.82                    | -0.87              | -0.88                     |
|                          | 2-butanol                    | 0.69                   | 0.85                    | -0.79                    | -0.87              | -0.88                     |
|                          | 1-pentanol                   | 0.36                   | 0.15                    | -0.24                    | -0.13              | -0.11                     |
|                          | 1,2-butanediol               | 0.32                   | 0.54                    | -0.45                    | -0.57              | -0.59                     |
|                          | 1-octen-3-ol                 | -0.60                  | -0.76                   | 0.70                     | 0.78               | 0.79                      |
|                          | 2-ethyl hexanol              | -0.65                  | -0.45                   | 0.54                     | 0.42               | 0.40                      |
|                          | 1-penten-3-ol                | -0.91                  | -0.96                   | 0.95                     | 0.96               | 0.96                      |
|                          | isopentyl alcohol            | -0.95                  | -0.99                   | 0.98                     | 1.00               | 1.00                      |
|                          | isobutanol                   | -0.96                  | -0.98                   | 0.98                     | 0.98               | 0.98                      |
| ketones                  | 2,3-pentanedione             | 0.92                   | 0.89                    | -0.91                    | -0.88              | -0.87                     |
|                          | 2,3-butanedione              | 0.91                   | 0.97                    | -0.95                    | -0.97              | -0.97                     |
|                          | acetyl acetophenone          | 0.51                   | 0.66                    | -0.60                    | -0.67              | -0.69                     |
|                          | acetoin                      | -0.73                  | -0.84                   | 0.80                     | 0.86               | 0.86                      |
|                          | 2-butanone                   | -0.89                  | -0.92                   | 0.91                     | 0.91               | 0.91                      |
|                          | acetone                      | -0.92                  | -0.96                   | 0.95                     | 0.96               | 0.96                      |
| aldehydes                | phenylacetaldehyde           | 0.94                   | 0.97                    | -0.96                    | -0.97              | -0.96                     |
|                          | hexanal                      | 0.84                   | 0.70                    | -0.76                    | -0.68              | -0.66                     |
|                          | 3-methylbutanal              | 0.78                   | 0.84                    | -0.82                    | -0.85              | -0.85                     |
|                          | 2-methylbutanal              | -0.02                  | 0.15                    | -0.08                    | -0.17              | -0.18                     |
| esters                   | lactic acid ethyl ester      | 0.99                   | 0.96                    | -0.98                    | -0.95              | -0.94                     |
|                          | acetic acid ethyl ester      | 0.82                   | 0.92                    | -0.89                    | -0.93              | -0.94                     |
| isoflavones              | daidzein                     | -0.69                  | -0.82                   | 0.77                     | 0.83               | 0.84                      |
|                          | glycitein                    | -0.74                  | -0.79                   | 0.77                     | 0.79               | 0.80                      |
|                          | genistein                    | -0.80                  | -0.88                   | 0.85                     | 0.89               | 0.89                      |
| other                    | uracil                       | 0.81                   | 0.89                    | -0.87                    | -0.90              | -0.90                     |
|                          | isovaleronitrile             | 0.21                   | 0.42                    | -0.33                    | -0.44              | -0.46                     |

**Table S4.** Pearson correlation coefficient between sensory qualities and metabolites.

|                          |                              | Umami | Sourness | Salty | Acetic Acid Odor | Bitterness | Ethanol Odor | Soy Sauce Odor | Sweetness |
|--------------------------|------------------------------|-------|----------|-------|------------------|------------|--------------|----------------|-----------|
| sugar                    | lyxose                       | 0.95  | 0.70     | 0.64  | 0.82             | 0.80       | 0.46         | 0.45           | 0.59      |
|                          | myo-inositol                 | 0.93  | 0.76     | 0.64  | 0.80             | 0.71       | 0.33         | 0.47           | 0.46      |
|                          | meso-erythritol              | 0.87  | 0.86     | 0.79  | 0.79             | 0.58       | 0.32         | 0.30           | 0.23      |
|                          | mannose                      | -0.24 | -0.46    | -0.45 | -0.26            | 0.08       | 0.17         | 0.10           | 0.33      |
|                          | arabinose                    | -0.29 | -0.43    | -0.40 | -0.23            | 0.12       | 0.27         | 0.07           | 0.31      |
|                          | talopyranose                 | -0.29 | -0.45    | -0.43 | -0.23            | 0.07       | 0.16         | 0.11           | 0.34      |
|                          | mannitol                     | -0.42 | -0.68    | -0.71 | -0.29            | 0.04       | -0.05        | 0.28           | 0.45      |
|                          | altronic acid                | -0.55 | -0.56    | -0.53 | -0.37            | -0.12      | 0.14         | 0.05           | 0.04      |
|                          | galactonic acid              | -0.69 | -0.83    | -0.80 | -0.60            | -0.31      | -0.19        | -0.02          | 0.09      |
| acidic compounds         | citric acid                  | 0.91  | 0.71     | 0.57  | 0.83             | 0.82       | 0.42         | 0.59           | 0.62      |
|                          | acetic acid                  | 0.76  | 0.90     | 0.88  | 0.69             | 0.43       | 0.34         | 0.06           | -0.02     |
|                          | ascorbic acid                | 0.70  | 0.94     | 0.93  | 0.75             | 0.44       | 0.47         | 0.06           | -0.09     |
|                          | lactic acid                  | 0.28  | 0.73     | 0.83  | 0.50             | 0.25       | 0.64         | -0.21          | -0.33     |
|                          | malonic acid                 | 0.20  | 0.61     | 0.73  | 0.43             | 0.28       | 0.75         | -0.23          | -0.29     |
|                          | phosphoric acid              | 0.16  | 0.47     | 0.54  | 0.47             | 0.44       | 0.66         | -0.03          | 0.02      |
|                          | oxalic acid                  | -0.15 | 0.27     | 0.30  | 0.21             | 0.04       | 0.54         | -0.03          | -0.35     |
|                          | succinic acid                | -0.30 | -0.20    | -0.18 | 0.01             | 0.13       | 0.47         | 0.17           | 0.06      |
|                          | isovaleric acid              | -0.43 | -0.45    | -0.36 | -0.30            | -0.01      | 0.31         | -0.09          | 0.08      |
| amino acids and peptides | malic acid                   | -0.57 | -0.19    | -0.09 | -0.23            | -0.23      | 0.31         | -0.27          | -0.41     |
|                          | serin                        | 0.95  | 0.78     | 0.66  | 0.84             | 0.78       | 0.39         | 0.53           | 0.57      |
|                          | glutamic acid                | 0.93  | 0.87     | 0.78  | 0.86             | 0.69       | 0.42         | 0.38           | 0.36      |
|                          | tryptophan                   | 0.91  | 0.93     | 0.86  | 0.88             | 0.75       | 0.56         | 0.37           | 0.34      |
|                          | glycine                      | 0.91  | 0.91     | 0.84  | 0.82             | 0.63       | 0.41         | 0.29           | 0.26      |
|                          | 2-aminobutyric acid          | 0.91  | 0.91     | 0.84  | 0.82             | 0.67       | 0.45         | 0.32           | 0.37      |
|                          | ornithine                    | 0.88  | 0.88     | 0.80  | 0.86             | 0.67       | 0.41         | 0.36           | 0.30      |
|                          | proline                      | 0.88  | 0.87     | 0.78  | 0.92             | 0.79       | 0.56         | 0.41           | 0.44      |
|                          | isoleucine                   | 0.87  | 0.88     | 0.80  | 0.82             | 0.64       | 0.37         | 0.32           | 0.29      |
|                          | alanine                      | 0.86  | 0.89     | 0.82  | 0.83             | 0.66       | 0.41         | 0.29           | 0.29      |
|                          | aspartic acid                | 0.84  | 0.88     | 0.81  | 0.75             | 0.53       | 0.31         | 0.22           | 0.16      |
|                          | glutamic acid 5-benzyl ester | 0.79  | 0.88     | 0.85  | 0.85             | 0.62       | 0.50         | 0.21           | 0.21      |
|                          | tyr-pro                      | 0.79  | 0.86     | 0.80  | 0.92             | 0.80       | 0.67         | 0.38           | 0.41      |
|                          | lysine                       | 0.75  | 0.37     | 0.24  | 0.61             | 0.68       | 0.08         | 0.56           | 0.79      |
|                          | leu-glu                      | 0.69  | 0.94     | 0.97  | 0.73             | 0.51       | 0.54         | -0.01          | 0.01      |
|                          | trp-asg                      | 0.69  | 0.88     | 0.93  | 0.78             | 0.57       | 0.58         | 0.01           | 0.09      |
|                          | glu-val                      | 0.38  | 0.60     | 0.74  | 0.59             | 0.57       | 0.80         | -0.06          | 0.09      |
| alcohols                 | asparagine                   | -0.09 | 0.25     | 0.35  | 0.28             | 0.24       | 0.66         | -0.04          | -0.13     |
|                          | pro-arg                      | -0.12 | 0.00     | 0.10  | 0.04             | 0.22       | 0.55         | -0.05          | 0.17      |
|                          | cyclo(his-pro)               | -0.52 | -0.67    | -0.63 | -0.47            | -0.16      | -0.02        | 0.00           | 0.18      |
|                          | glycerol                     | 0.91  | 0.87     | 0.76  | 0.87             | 0.70       | 0.39         | 0.44           | 0.39      |
|                          | 2-butanol                    | 0.87  | 0.70     | 0.59  | 0.67             | 0.51       | 0.13         | 0.36           | 0.34      |
|                          | 1,2-butanediol               | 0.78  | 0.40     | 0.22  | 0.55             | 0.50       | -0.06        | 0.57           | 0.58      |
|                          | 1,3-butanediol               | 0.71  | 0.96     | 0.95  | 0.75             | 0.51       | 0.60         | 0.06           | -0.10     |
|                          | isopropenylethyl alcohol     | 0.67  | 0.94     | 0.94  | 0.73             | 0.49       | 0.62         | 0.01           | -0.10     |
|                          | 2,3-butanediol               | 0.66  | 0.95     | 0.95  | 0.74             | 0.51       | 0.64         | 0.05           | -0.06     |
|                          | ethanol                      | 0.58  | 0.90     | 0.95  | 0.63             | 0.37       | 0.52         | -0.14          | -0.20     |
|                          | 2-ethyl hexanol              | 0.14  | -0.41    | -0.57 | 0.02             | 0.29       | -0.23        | 0.62           | 0.80      |
|                          | 1-pentanol                   | -0.01 | 0.46     | 0.56  | 0.30             | 0.22       | 0.72         | -0.20          | -0.33     |
| ketones                  | 1-octen-3-ol                 | -0.59 | -0.45    | -0.35 | -0.34            | -0.14      | 0.25         | -0.19          | -0.09     |
|                          | 1-penten-3-ol                | -0.61 | -0.73    | -0.71 | -0.45            | -0.15      | -0.08        | 0.08           | 0.21      |
|                          | isobutanol                   | -0.61 | -0.80    | -0.80 | -0.52            | -0.22      | -0.17        | 0.09           | 0.20      |
|                          | isopentyl alcohol            | -0.70 | -0.83    | -0.81 | -0.59            | -0.31      | -0.20        | -0.01          | 0.09      |
|                          | acetyl acetophenone          | 0.92  | 0.71     | 0.55  | 0.86             | 0.80       | 0.37         | 0.66           | 0.60      |
|                          | 2,3-butanedione              | 0.84  | 0.90     | 0.84  | 0.77             | 0.53       | 0.35         | 0.21           | 0.11      |
|                          | 2,3-pentanedione             | 0.69  | 0.93     | 0.95  | 0.78             | 0.53       | 0.56         | 0.07           | -0.01     |
|                          | 2-butanone                   | -0.49 | -0.67    | -0.68 | -0.34            | -0.03      | -0.05        | 0.16           | 0.36      |
| aldehydes                | acetoin                      | -0.59 | -0.55    | -0.47 | -0.42            | -0.16      | 0.15         | -0.13          | 0.02      |
|                          | acetone                      | -0.61 | -0.75    | -0.73 | -0.46            | -0.17      | -0.14        | 0.04           | 0.24      |
|                          | 3-methylbutanal              | 0.88  | 0.91     | 0.81  | 0.91             | 0.73       | 0.54         | 0.47           | 0.28      |
|                          | phenylacetaldehyde           | 0.78  | 0.92     | 0.89  | 0.77             | 0.52       | 0.40         | 0.14           | 0.07      |
| esters                   | 2-methylbutanal              | 0.65  | 0.21     | 0.13  | 0.61             | 0.69       | 0.14         | 0.63           | 0.90      |
|                          | hexanal                      | 0.38  | 0.80     | 0.91  | 0.52             | 0.31       | 0.64         | -0.27          | -0.31     |
| isoflavones              | acetic acid ethyl ester      | 0.88  | 0.84     | 0.77  | 0.80             | 0.58       | 0.29         | 0.30           | 0.28      |
|                          | lactic acid ethyl ester      | 0.64  | 0.92     | 0.95  | 0.62             | 0.34       | 0.44         | -0.10          | -0.20     |
| other                    | glycitein                    | -0.33 | -0.46    | -0.42 | -0.23            | 0.06       | 0.25         | 0.10           | 0.26      |
|                          | genistein                    | -0.53 | -0.57    | -0.56 | -0.33            | -0.07      | 0.09         | 0.06           | 0.17      |
|                          | daidzein                     | -0.59 | -0.51    | -0.43 | -0.38            | -0.16      | 0.18         | -0.12          | -0.03     |
| other                    | uracil                       | 0.92  | 0.92     | 0.86  | 0.85             | 0.70       | 0.50         | 0.32           | 0.32      |
|                          | isovaleronitrile             | 0.84  | 0.40     | 0.26  | 0.64             | 0.69       | 0.17         | 0.63           | 0.76      |
